# Supplementary material for: First COVID-19 Booster Dose in the General Population: A Systematic Review and Meta-Analysis of Willingness and Its Predictors
Source: MDPI journal article supplement (doi:10.3390/vaccines10071097), 2022-07-08
Supplement: s1 [file s1]

Supplement Table S1. Quality of studies included in this systematic review.

|                                                                             | (Lounis et al., 2022) | (Rzymiski et al., 2021) | (Lai et al., 2021) | (Al-Qerem et al., 2022) | (Wu et al., 2022) | (Miao et al., 2022) |
|-----------------------------------------------------------------------------|-----------------------|-------------------------|--------------------|-------------------------|-------------------|---------------------|
| 1. Were the criteria for inclusion in the sample clearly defined?           | Yes                   | Yes                     | Yes                | Yes                     | Yes               | Yes                 |
| 2. Were the study subjects and the setting described in detail?             | Yes                   | Yes                     | Yes                | Yes                     | Yes               | Yes                 |
| 3. Was the exposure measured in a valid and reliable way?                   | Yes                   | Yes                     | Yes                | Yes                     | Yes               | Yes                 |
| 4. Were objective, standard criteria used for measurement of the condition? | Yes                   | Yes                     | Yes                | Yes                     | Yes               | Yes                 |
| 5. Were confounding factors identified?                                     | Yes                   | No                      | Yes                | Yes                     | Yes               | Yes                 |
| 6. Were strategies to deal with confounding factors stated?                 | Yes                   | No                      | Yes                | Yes                     | Yes               | Yes                 |
| 7. Were the outcomes measured in a valid and reliable way?                  | Yes                   | Yes                     | Yes                | Yes                     | Yes               | Yes                 |
| 8. Was appropriate statistical analysis used?                               | Yes                   | Yes                     | Yes                | Yes                     | Yes               | Yes                 |
| <b>Risk of bias</b>                                                         | <b>Low</b>            | <b>Moderate</b>         | <b>Low</b>         | <b>Low</b>              | <b>Low</b>        | <b>Low</b>          |

NA: not applicable

Supplement Table S1 (continued). Quality of studies included in this systematic review.

|                                                                             | (Chu et al., 2022) | (Jørgensen et al., 2022) | (Wang et al., 2022) | (Rababa'h et al., 2021) | (Paul & Fancourt, 2022) | (Yadete et al., 2021) | (Yoshida et al., 2022) | (Wirawan et al., 2022) |
|-----------------------------------------------------------------------------|--------------------|--------------------------|---------------------|-------------------------|-------------------------|-----------------------|------------------------|------------------------|
| 1. Were the criteria for inclusion in the sample clearly defined?           | Yes                | Yes                      | Yes                 | Yes                     | Yes                     | Yes                   | Yes                    | Yes                    |
| 2. Were the study subjects and the setting described in detail?             | Yes                | Yes                      | Yes                 | Yes                     | Yes                     | Yes                   | Yes                    | Yes                    |
| 3. Was the exposure measured in a valid and reliable way?                   | Yes                | Yes                      | Yes                 | Yes                     | Yes                     | Yes                   | Yes                    | Yes                    |
| 4. Were objective, standard criteria used for measurement of the condition? | Yes                | Yes                      | Yes                 | Yes                     | Yes                     | Yes                   | Yes                    | Yes                    |
| 5. Were confounding factors identified?                                     | Yes                | Yes                      | Yes                 | NA                      | Yes                     | NA                    | Yes                    | Yes                    |
| 6. Were strategies to deal with confounding factors stated?                 | Yes                | Yes                      | Yes                 | NA                      | Yes                     | NA                    | Yes                    | Yes                    |
| 7. Were the outcomes measured in a valid and reliable way?                  | Yes                | Yes                      | Yes                 | Yes                     | Yes                     | Yes                   | Yes                    | Yes                    |
| 8. Was appropriate statistical analysis used?                               | Yes                | Yes                      | Yes                 | Yes                     | Yes                     | Yes                   | Yes                    | Yes                    |
| <b>Risk of bias</b>                                                         | <b>Low</b>         | <b>Low</b>               | <b>Low</b>          | <b>Low</b>              | <b>Low</b>              | <b>Low</b>            | <b>Low</b>             | <b>Low</b>             |

NA: not applicable

## References

- Al-Qerem, W., Al Bawab, A. Q., Hammad, A., Ling, J., & Alasmari, F. (2022). Willingness of the Jordanian Population to Receive a COVID-19 Booster Dose: A Cross-Sectional Study. *Vaccines*, 10(3), 410. <https://doi.org/10.3390/vaccines10030410>
- Chu, D.-T., Vu Thi, H., Nguyen Thi, Y. V., Nguyen, M.-A., Bui, N.-L., Hoang, V. T., Hoang Nam, D., Do, D.-L., than, V. T., & Al-Tawfiq, J. A. (2022). Willingness to receive COVID-19 vaccine booster doses for adults and their children in Vietnam. *Journal of Human Behavior in the Social Environment*, 1–13. <https://doi.org/10.1080/10911359.2022.2046235>
- Jørgensen, F. J., Nielsen, L. H., & Petersen, M. B. (2022). Willingness to Take the Booster Vaccine in a Nationally Representative Sample of Danes. *Vaccines*, 10(3), 425. <https://doi.org/10.3390/vaccines10030425>
- Lai, X., Zhu, H., Wang, J., Huang, Y., Jing, R., Lyu, Y., Zhang, H., Feng, H., Guo, J., & Fang, H. (2021). Public Perceptions and Acceptance of COVID-19 Booster Vaccination in China: A Cross-Sectional Study. *Vaccines*, 9(12), 1461. <https://doi.org/10.3390/vaccines9121461>
- Lounis, M., Bencherit, D., Rais, M. A., & Riad, A. (2022). COVID-19 Vaccine Booster Hesitancy (VBH) and Its Drivers in Algeria: National Cross-Sectional Survey-Based Study. *Vaccines*, 10(4), 621. <https://doi.org/10.3390/vaccines10040621>
- Miao, Y., Li, Y., Zhang, W., Wu, J., Gu, J., Wang, M., Wei, W., Ye, B., Miao, C., Tarimo, C. S., & Dong, W. (2022). The Psychological Experience of COVID-19 Vaccination and Its Impact on the Willingness to Receive Booster Vaccines among the Chinese Population: Evidence from a National Cross-Sectional Study. *International Journal of Environmental Research and Public Health*, 19(9), 5464. <https://doi.org/10.3390/ijerph19095464>

- Paul, E., & Fancourt, D. (2022). Predictors of uncertainty and unwillingness to receive the COVID-19 booster vaccine: An observational study of 22,139 fully vaccinated adults in the UK. *The Lancet Regional Health - Europe*, 14, 100317. <https://doi.org/10.1016/j.lanepe.2022.100317>
- Rababa'h, A. M., Abedalqader, N. N., & Ababneh, M. (2021). Jordanians' willingness to receive heterologous prime-boost COVID-19 vaccination and vaccine boosters. *European Review for Medical and Pharmacological Sciences*, 25(23), 7516–7525. [https://doi.org/10.26355/eurrev\\_202112\\_27452](https://doi.org/10.26355/eurrev_202112_27452)
- Rzymiski, P., Poniedziałek, B., & Fal, A. (2021). Willingness to Receive the Booster COVID-19 Vaccine Dose in Poland. *Vaccines*, 9(11), 1286. <https://doi.org/10.3390/vaccines9111286>
- Wang, X., Liu, L., Pei, M., Li, X., Li, N., Research Center of Clinical Epidemiology, Peking University Third Hospital, Beijing, China, & Department of Infectious Diseases, Peking University Third Hospital, Beijing, China. (2022). Willingness of the General Public to Receive A COVID-19 Vaccine Booster—China, April–May 2021. *China CDC Weekly*, 4(4), 66–70. <https://doi.org/10.46234/ccdcw2022.013>
- Wirawan, G. B. S., Harjana, N. P. A., Nugrahani, N. W., & Januraga, P. P. (2022). Health Beliefs and Socioeconomic Determinants of COVID-19 Booster Vaccine Acceptance: An Indonesian Cross-Sectional Study. *Vaccines*, 10(5), 724. <https://doi.org/10.3390/vaccines10050724>
- Wu, F., Yuan, Y., Deng, Z., Yin, D., Shen, Q., Zeng, J., Xie, Y., Xu, M., Yang, M., Jiang, S., Zhang, C., Lu, H., & Sun, C. (2022). Acceptance of COVID-19 booster vaccination based on the protection motivation theory: A cross-sectional study in China. *Journal of Medical Virology*, jmv.27825. <https://doi.org/10.1002/jmv.27825>

Yadete, T., Batra, K., Netski, D. M., Antonio, S., Patros, M. J., & Bester, J. C. (2021). Assessing Acceptability of COVID-19 Vaccine Booster Dose among Adult Americans: A Cross-Sectional Study. *Vaccines*, 9(12), 1424. <https://doi.org/10.3390/vaccines9121424>

Yoshida, M., Kobashi, Y., Kawamura, T., Shimazu, Y., Nishikawa, Y., Omata, F., Zhao, T., Yamamoto, C., Kaneko, Y., Nakayama, A., Takita, M., Ito, N., Kawashima, M., Sugiura, S., Shibuya, K., Iwami, S., Kim, K., Iwanami, S., Kodama, T., & Tsubokura, M. (2022). Factors Associated with COVID-19 Vaccine Booster Hesitancy: A Retrospective Cohort Study, Fukushima Vaccination Community Survey. *Vaccines*, 10(4), 515. <https://doi.org/10.3390/vaccines10040515>
